# Supplementary material for: Beneficial effects of stoichiometry and nanostructure for a LiBH4–MgH2hydrogen storage system
Source: Royal Society of Chemistry journal article supplement (doi:10.1039/c3ta13775a), 2013-10-23

## Electronic Supplementary Information (ESI)

### Beneficial effects of stoichiometry and nanostructure for $\text{LiBH}_4\text{-MgH}_2$ hydrogen storage system

Jianjiang Hu<sup>a\*</sup>, Raiker Witter<sup>a,b</sup>, Huaiyu Shao<sup>c</sup>, Michael Felderhoff<sup>c</sup> and Maximilian Fichtner<sup>a</sup>

<sup>a</sup>Institute of Nanotechnology, Karlsruhe Institute of Technology (KIT), P.O. Box 3640, D-76021 Karlsruhe, Germany

<sup>b</sup>Technomedicum, Tallinn University of Technology, Ehitajate tee 5, 19086 Tallinn, Estonia

<sup>c</sup>Max-Planck-Institut für Kohlenforschung, Kaiser-Wilhelm-Platz 1, D-45470 Mülheim an der Ruhr, Germany

Figure 1s DSC curve of <sup>\*</sup>MgH<sub>2</sub>

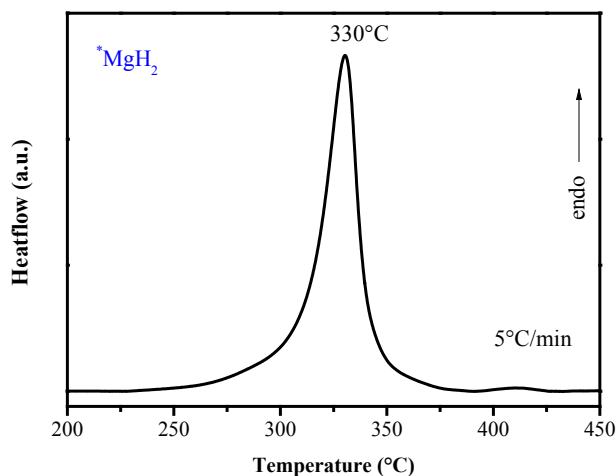

The peak temperature of <sup>\*</sup>MgH<sub>2</sub> was 330°C, whereas those of Nb<sub>2</sub>O<sub>5</sub> doped MgH<sub>2</sub> or MgD<sub>2</sub> were about 200°C in Ref. 22, by 130°C lower. However, Nb<sub>2</sub>O<sub>5</sub> doped MgH<sub>2</sub> or MgD<sub>2</sub> lost its reactivity in the composite with LiBH<sub>4</sub>, while the reactivity of <sup>\*</sup>MgH<sub>2</sub> remained.

\*Corresponding author: Tel.: +49 721 6082 8915; fax: +49 721 6082 6368. E-mail: jianjiang.hu@kit.edu

## Electronic Supplementary Information (ESI)

Figure 2s XRD profiles of as-milled samples from  $x=0.2 - 2.0$

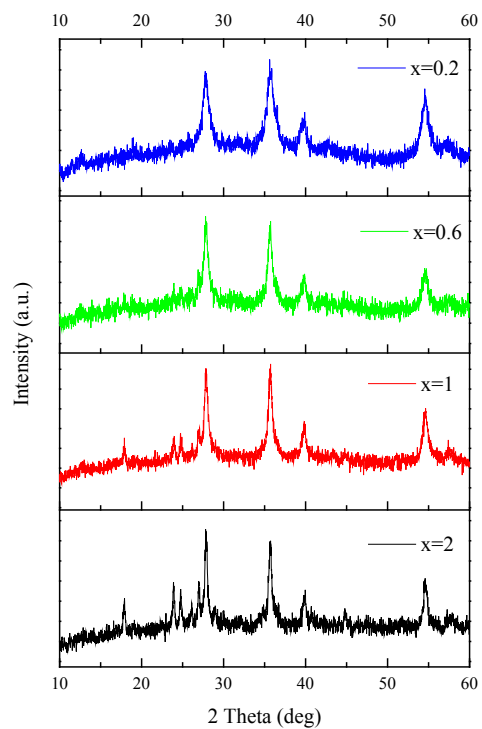

Supplement: c3ta13775a.pdf [file c3ta13775a.pdf]
